# Supplementary material for: The incidence of late prosthetic joint infections: A registry-based study of 112,708 primary hip and knee replacements
Source: PubMed Central journal article supplement — Acta Orthop. 2015 May 13;86(3):321–5. doi: 10.3109/17453674.2015.1035173 (PMC4443453; doi:10.3109/17453674.2015.1035173), 2015-05-13
Supplement: ORT-86-321-s8258.pdf [file ORT-86-321-s8258.pdf]

## Supplementary article data

# The incidence of late prosthetic joint infections

## A registry-based study of 112,708 primary hip and knee replacements

Kaisa HUOTARI<sup>1</sup>, Mikko PELTOLA<sup>2</sup>, and Esa JÄMSEN<sup>3</sup>

<sup>1</sup> Division of Infectious Diseases, Department of Medicine, Helsinki University Hospital and University of Helsinki, Helsinki; <sup>2</sup> Centre for Health and Social Economics (CHESS), National Institute for Health and Welfare, Helsinki; <sup>3</sup> Coxa, Hospital for Joint Replacement and School of Medicine, University of Tampere, Tampere, Finland.

Correspondence: kaisa.huotari@hus.fi

Submitted 2014-11-11. Accepted 2015-02-10.

**Table 1. Prosthetic joint infection (PJI) incidence rates by surveillance year after primary joint replacement**

| Year under surveillance | Prostheses under surveillance <sup>a</sup> | Number of PJIs | Incidence rate (%) of PJI per prosthesis-year (95% CI) |
|-------------------------|--------------------------------------------|----------------|--------------------------------------------------------|
| 1                       | 110,749                                    | 895            | 0.808 (0.757–0.863)                                    |
| 2                       | 103,104                                    | 170            | 0.165 (0.142–0.192)                                    |
| 3                       | 89,264                                     | 95             | 0.106 (0.087–0.130)                                    |
| 4                       | 76,151                                     | 51             | 0.067 (0.051–0.088)                                    |
| 5                       | 63,317                                     | 43             | 0.068 (0.050–0.091)                                    |
| 6                       | 50,435                                     | 25             | 0.050 (0.034–0.073)                                    |
| 7                       | 40,046                                     | 15             | 0.037 (0.023–0.062)                                    |
| 8                       | 31,137                                     | 24             | 0.077 (0.052–0.115)                                    |
| 9                       | 22,814                                     | 10             | 0.044 (0.024–0.081)                                    |
| 10                      | 15,822                                     | 8              | 0.051 (0.026–0.100)                                    |
| 11                      | 10,300                                     | 6              | 0.058 (0.027–0.127)                                    |
| 12                      | 5,628                                      | 3              | 0.053 (0.018–0.157)                                    |
| 13                      | 1,684                                      | 0              | 0.000 (0.000–0.228)                                    |

<sup>a</sup> In the middle of the surveillance year

**Table 2. Cumulative prosthetic joint infection (PJI) incidences by operated joint**

| Time period after surgery | Total           |                                   | Hips            |                                   | Knees           |                                   | p-value (hip vs. knee) |
|---------------------------|-----------------|-----------------------------------|-----------------|-----------------------------------|-----------------|-----------------------------------|------------------------|
|                           | PJIs/prostheses | Cumulative incidence (%) (95% CI) | PJIs/prostheses | Cumulative incidence (%) (95% CI) | PJIs/prostheses | Cumulative incidence (%) (95% CI) |                        |
| Entire follow-up          | 1,345/112,708   | 1.20 (1.13–1.26)                  | 464/50,272      | 0.92 (0.84–1.01)                  | 881/62,436      | 1.41 (1.32–1.51)                  | < 0.001                |
| < 2 years                 | 1,065/112,708   | 0.95 (0.89–1.00)                  | 355/50,272      | 0.71 (0.64–0.78)                  | 710/62,436      | 1.14 (1.06–1.22)                  | < 0.001                |
| 2–13 years                | 280/112,708     | 0.25 (0.22–0.28)                  | 109/50,272      | 0.22 (0.18–0.26)                  | 171/62,436      | 0.27 (0.24–0.32)                  | 0.056                  |

Table 3. The results of sensitivity analyses

| Outcome                                                                      | Original analysis   | Sensitivity analyses                                   |                                                   |                                                             |
|------------------------------------------------------------------------------|---------------------|--------------------------------------------------------|---------------------------------------------------|-------------------------------------------------------------|
|                                                                              |                     | Exclusion of simultaneous bilateral joint replacements | PJIs with uncertain linkage included as endpoints | Patients with only one joint operated between 1980 and 2011 |
| Cumulative PJI incidence (%), (95% CI)                                       | 1.20 (1.13–1.26)    | 1.17 (1.10–1.23)                                       | 1.51 (1.44–1.58)                                  | 1.42 (1.32–1.52)                                            |
| Incidence rate (%) of late PJI per prosthesis-year (95% CI)                  | 0.069 (0.061–0.078) | 0.067 (0.059–0.075)                                    | 0.103 (0.094–0.114)                               | 0.092 (0.07–0.110)                                          |
| Incidence rate of (%) very late PJI per prosthesis-year (95% CI)             | 0.051 (0.042–0.063) | 0.050 (0.040–0.062)                                    | 0.095 (0.081–0.110)                               | 0.073 (0.056–0.096)                                         |
| Change in the incidence rate of late PJI, incidence rate ratio (95% CI)      | 0.98 (0.93–1.03)    | 0.99 (0.94–1.03)                                       | 0.99 (0.95–1.03)                                  | 1.02 (0.94–1.03)                                            |
| Change in the incidence rate of very late PJI, incidence rate ratio (95% CI) | 1.11 (1.02–1.20)    | 1.11 (1.03–1.19)                                       | 1.04 (0.99–1.08)                                  | 1.10 (0.94–1.30)                                            |

PJI: prosthetic joint infection.
